# Supplementary material
Source: PubMed Central journal article supplement (PMC2850205)
Supplement: NIHMS181858-supplement-1.pdf [file NIHMS181858-supplement-1.pdf]

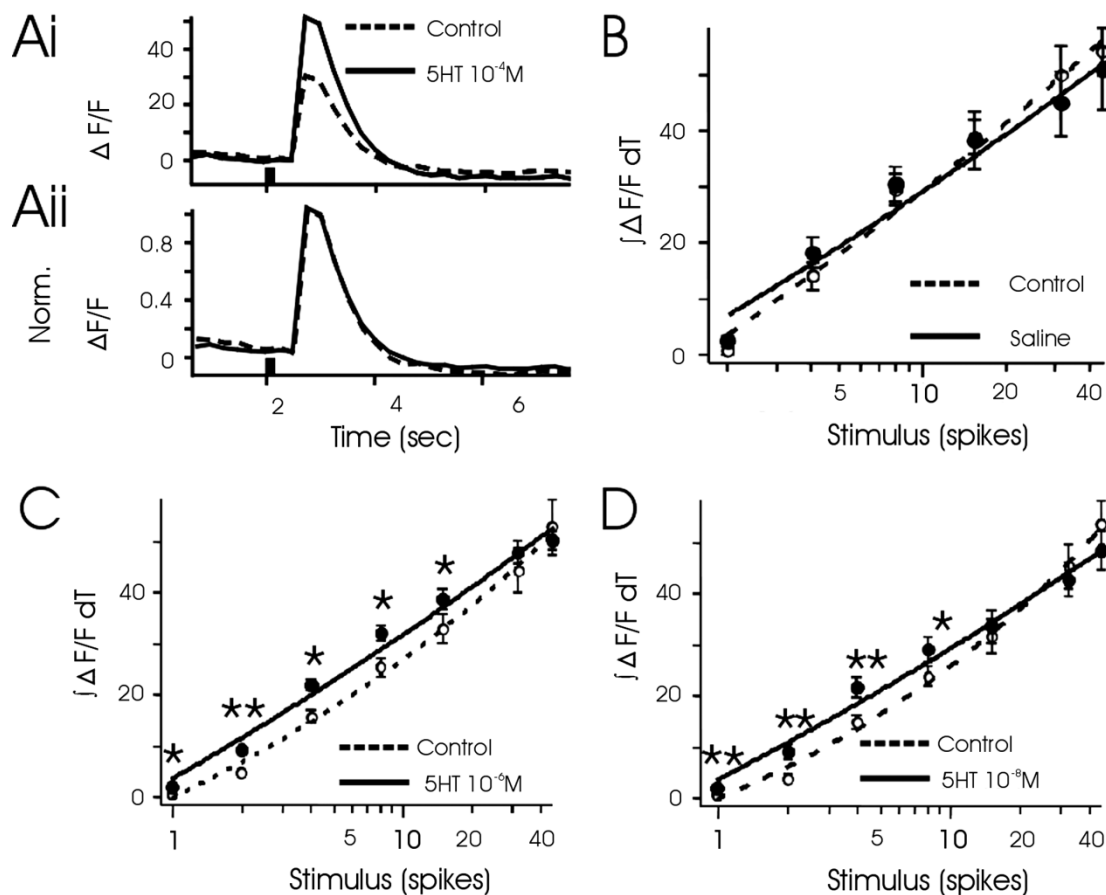

**Supplemental Figure 1.** (A) Time course of PN responses are unaffected by 5HT. Stimulus onset at time 2 seconds, as indicated by black bar. (Ai) Average time course of responses to 8 spikes in stimulation, as measured across the entire AL before (hatched line) and after (solid line) 5HT application. (Aii) Time course of responses to 8 spikes in stimulation, as measured across the entire AL before and after 5HT application normalized to the maximum value for each treatment. (B) PN responses are unaffected by saline addition ( $n=9$ ,  $P=0.14-0.85$ ). (C) PN responses are enhanced at lower stimulus intensities by 5HT at  $10^{-6}$  M ( $n=9$ ,  $*P<0.05$ ;  $**P<0.005$ ). (D) PN responses are enhanced at lower stimulus intensities by 5HT at  $10^{-8}$  M ( $n=9$ ;  $*P<0.01$ ;  $**P<0.005$ ). Data in B-D are represented as mean  $\pm$  SEM.
